# Supplementary material
Source: Royal Society of Chemistry journal article supplement (doi:10.1039/d6nj00328a)
Supplement: d6nj00328a1.pdf [file d6nj00328a1.pdf]

The hierarchical nanorod-branched structure of NiO by P, Ni co-doping for boosting  
energy storage property as electrode materials of supercapacitor

Zhijun Wang<sup>b</sup>, Shuting Han<sup>b</sup>, Yingjing Liu<sup>b</sup>, Lingli Liao<sup>a</sup>, Yinfeng Wang<sup>b</sup>, Lina Yang<sup>a</sup>,  
Xiaojiao Wu<sup>a</sup>, Xiaoxue Zhang<sup>a</sup>, Xuexia Liu<sup>a,\*</sup>

a School of Forensic Medicine, Wannan Medical College, Wuhu, Anhui, 241002, PR China

b College of Chemistry and Chemical Engineering, Jinggangshan University, Ji'an, Jiangxi,  
343009, PR China

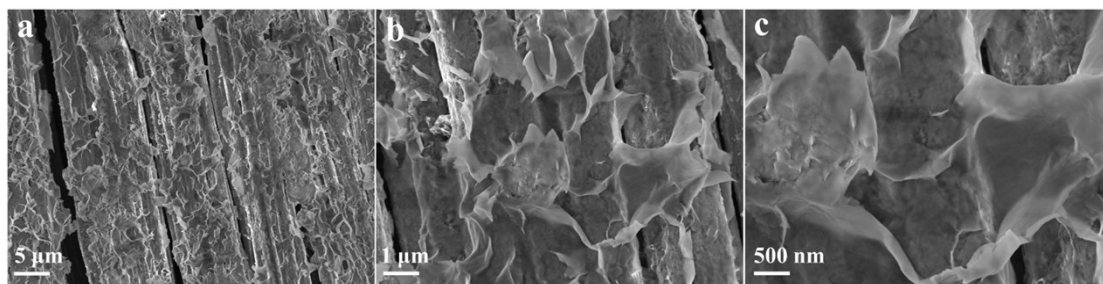

**Fig. S1.** (a-c) SEM images of Ni(OH)<sub>2</sub>/CC

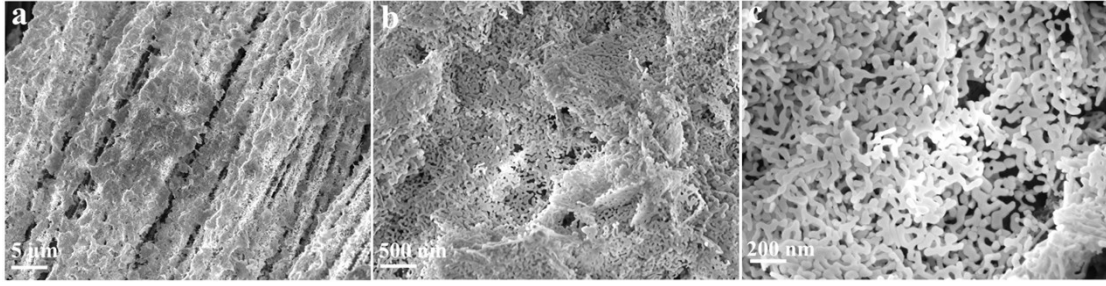

**Fig. S2.** (a-c) SEM images of NiO/CC

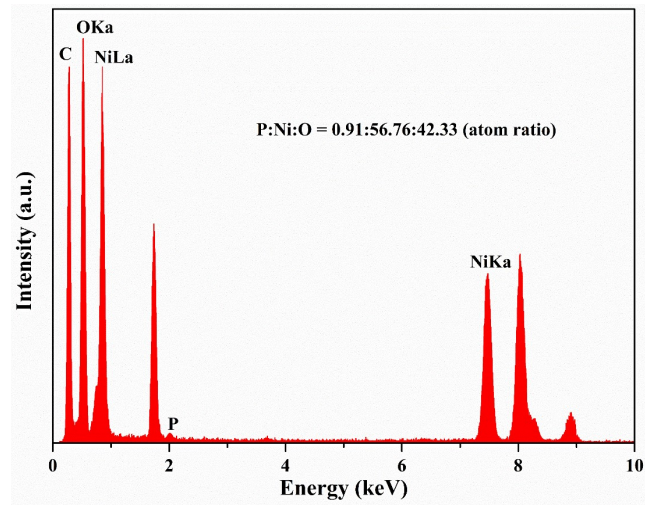

**Fig. S3.** EDX spectrum of P, Ni-NiO/CC

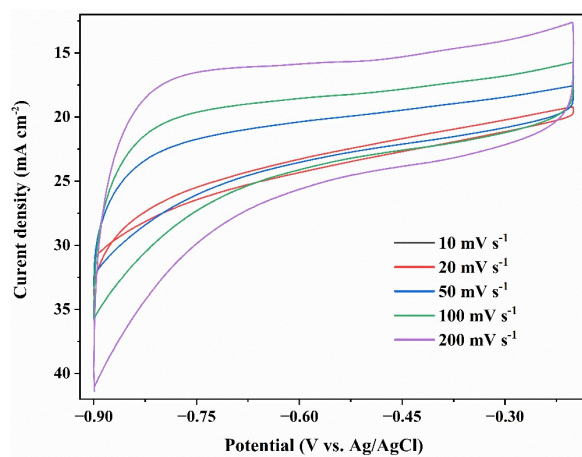

**Fig. S4.** CV curves of Ni(OH)<sub>2</sub>/CC at 10, 20, 50, 100 and 200 mV s<sup>-1</sup>.

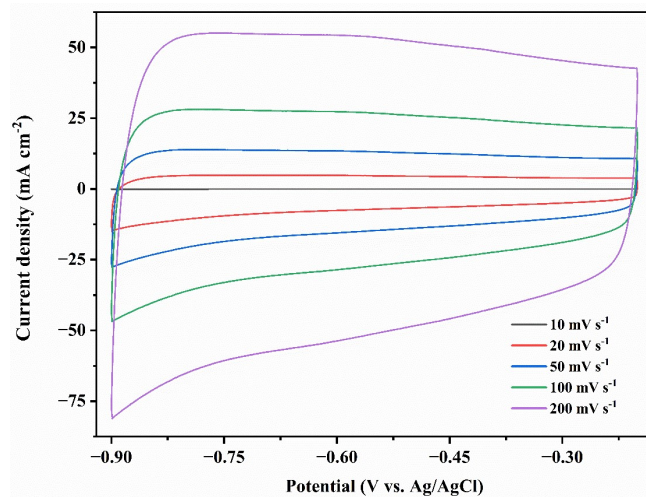

**Fig. S5.** CV curves of NiO/CC at 10, 20, 50, 100 and 200 mV s<sup>-1</sup>.

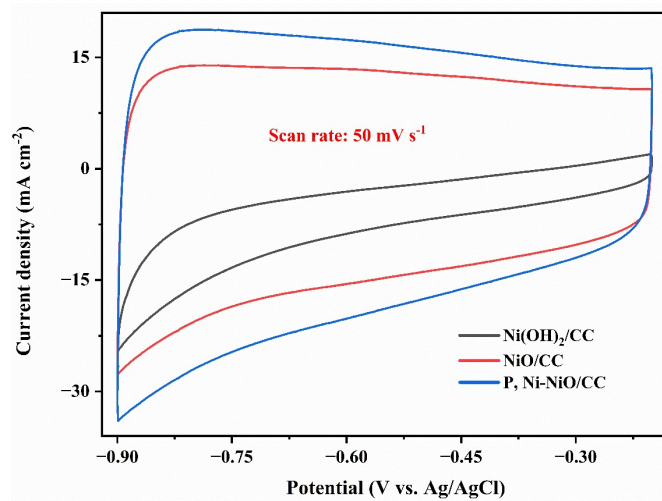

**Fig. S6.** CV curves of Ni(OH)<sub>2</sub>/CC, NiO/CC and P, Ni-NiO/CC at 50 mV s<sup>-1</sup>.

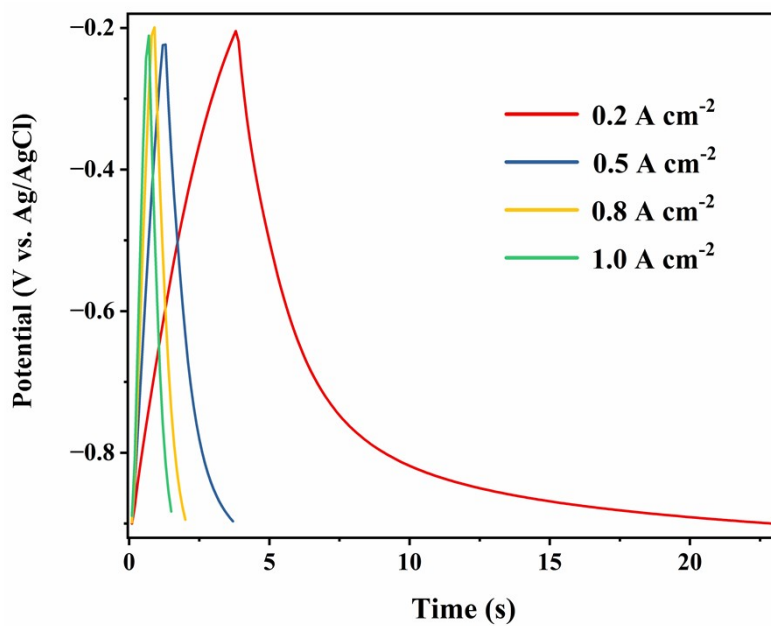

**Fig. S7.** GCD curves of Ni(OH)<sub>2</sub>/CC at 0.2, 0.5, 0.8 and 1.0 A cm<sup>-2</sup>.

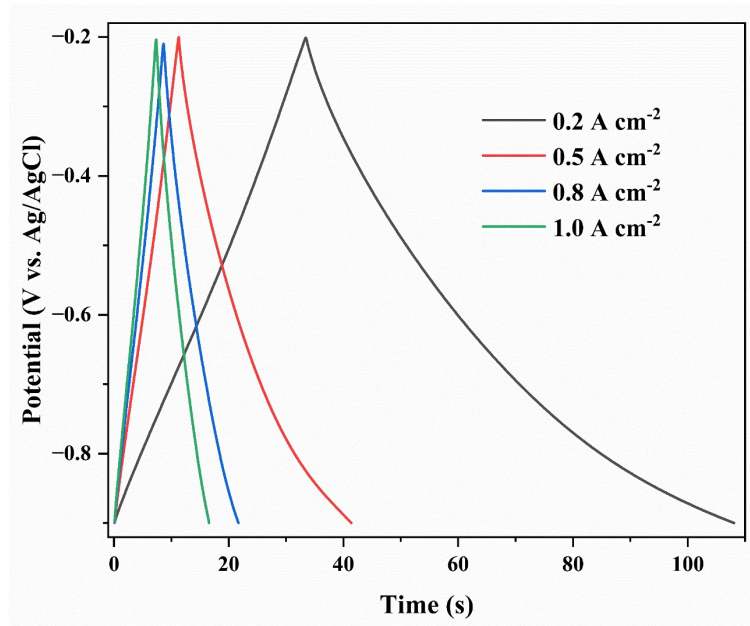

**Fig. S8.** GCD curves of NiO/CC at 0.2, 0.5, 0.8 and 1.0 A cm<sup>-2</sup>.

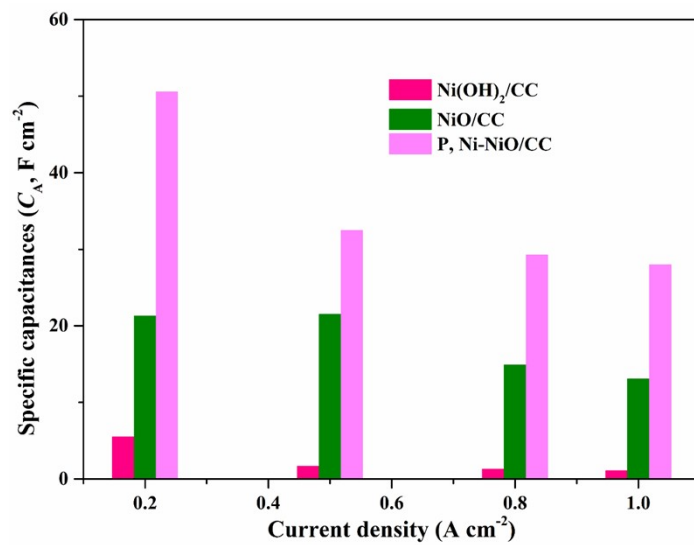

**Fig. S9.** Specific capacitances of Ni(OH)<sub>2</sub>/CC, NiO/CC and P, Ni-NiO/CC at current density of 0.2, 0.5, 0.8 and 1.0 A cm<sup>-2</sup>.

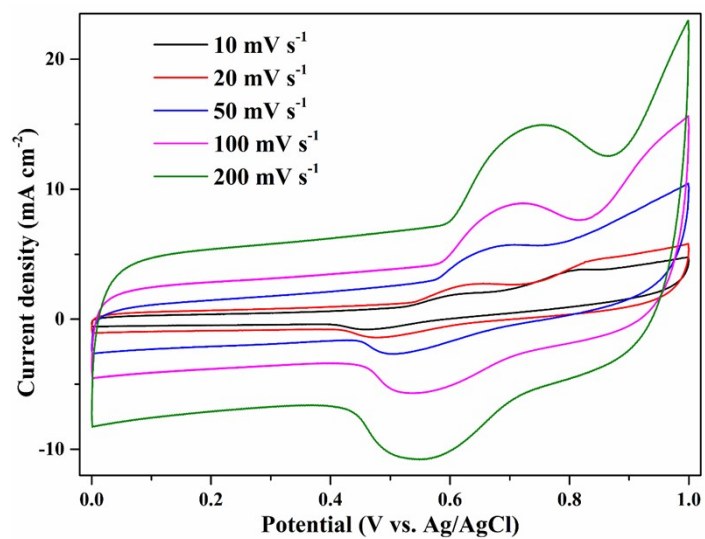

**Fig. S10.** CV curves of P, Ni-NiO/CC at 10, 20, 50, 100 and 200 mV s<sup>-1</sup> for the symmetric supercapacitor device.

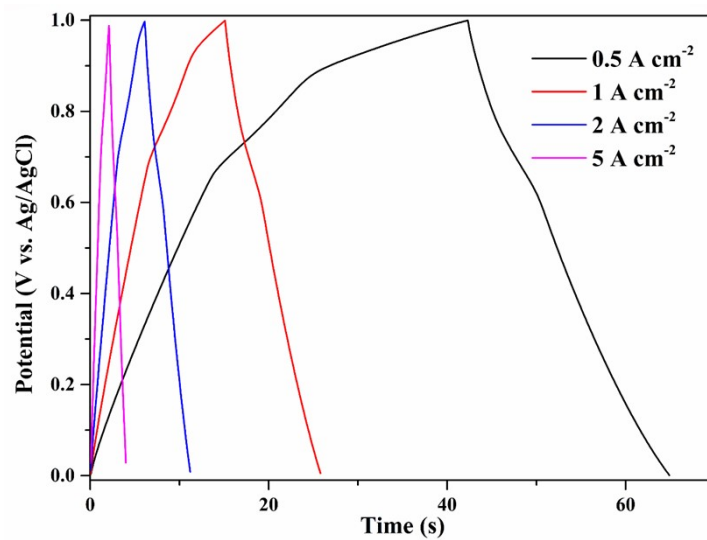

**Fig. S11.** GCD curves of P, Ni-NiO/CC at 0.5, 1, 2 and 5 A cm<sup>-2</sup> for the symmetric supercapacitor device.

**Table S1** The specific capacitance of NiO/CC and other NiO-based materials.

| <b>Material</b>                                                   | <b>Specific capacity</b>  | <b>Current density</b>  | <b>Refs.</b> |
|-------------------------------------------------------------------|---------------------------|-------------------------|--------------|
| <b>P, Ni-NiO/CC</b>                                               | 50.6 F cm <sup>-2</sup>   | 0.2 A cm <sup>-2</sup>  | This work    |
| <b>Ni/NiO</b>                                                     | 684.4 mF cm <sup>-2</sup> | 1 mA cm <sup>-2</sup>   | 1            |
| <b>(Fe-Co) co-doped NiO</b>                                       | 58.7 F g <sup>-1</sup>    | 1 mA cm <sup>-2</sup>   | 2            |
| <b>NiO@CoO/CC</b>                                                 | 2.87 F cm <sup>-2</sup>   | 1 A g <sup>-1</sup>     | 3            |
| <b>Co<sub>3</sub>O<sub>4</sub>@MnO<sub>2</sub>@NiO nanoarrays</b> | 6.42 F cm <sup>-2</sup>   | 1 mA cm <sup>-2</sup>   | 4            |
| <b>CC/NiCo<sub>2</sub>O<sub>4</sub>-N@NiO</b>                     | 921.9 mF cm <sup>-2</sup> | 2 mA cm <sup>-2</sup>   | 5            |
| <b>NiO@Ni(OH)<sub>2</sub></b>                                     | 2.509 F cm <sup>-2</sup>  | 1 mA cm <sup>-2</sup>   | 6            |
| <b>NiO nanoplatelet arrays</b>                                    | 320 F g <sup>-1</sup>     | 4 mA cm <sup>-2</sup>   | 7            |
| <b>NiO-CuO mesoporous</b>                                         | 1450.8 F g <sup>-1</sup>  | 2 mA cm <sup>-2</sup>   | 8            |
| <b>Co-doped NiO nanosheets</b>                                    | 1244 F g <sup>-1</sup>    | 5 mA cm <sup>-2</sup>   | 9            |
| <b>Nanonet/nanoflower NiO</b>                                     | 8400 F g <sup>-1</sup>    | 0.1 mA cm <sup>-2</sup> | 10           |

## Supporting References

- [1] Y. Jiao, W. Z. Hong, P. Y. Li, L. X. Wang, G. Chen, *Appl. Catal. B-Environ.*, 2019, **244**, 732-739.
- [2] A. Kumar, M. A. Shah, *J. Energy Storage*, 2024, **92**, 112188.
- [3] S. Li, R. C. Feng, M. Li, X. Zhao, B. H. Zhang, Y. Liang, H. P. Ning, J. L. Wang, C. R. Wang, P. K. Chu, *RSC Adv.*, 2020, **10**, 37489-37499.
- [4] Z. Wang, F. Tang, T. Li, X. Jiang, J. Xu, L. Cui, J. Liu, *J. Energy Storage*, 2024, **101**, 113776.
- [5] Y. Ouyang, R. J. Huang, X. F. Xia, H. T. Ye, X. Y. Jiao, L. Wang, W. Lei, Q. L. Hao, *Chem. Eng. J.*, 2019, **355**, 416-427.
- [6] S. A. Mozaffari, S. H. M. Najafi, Z. Norouzi, *Electrochim. Acta*, 2021, **368**, 137633.
- [7] J. Li, W. Zhao, F. Huang, A. Manivannan, N. Wu, *Nanoscale*, 2011, **3**, 5103-5109.
- [8] Z. Fang, S. ur Rehman, M. Sun, Y. Yuan, S. Jin, H. Bi, *J. Mater. Chem. A*, 2018, **6**, 21131-21142.
- [9] H. Xu, Y. Cao, Y. Li, P. Cao, D. Liu, Y. Zhang, Q. Li, *J. Energy Chem.*, 2020, **50**, 240-247.
- [10] S. Cheng, L. Yang, Y. Liu, W. Lin, L. Huang, D. Chen, C. Wong, M. Liu, *J. Mater. Chem. A*, 2013, **1**, 7709.
